# Supplementary material
Source: PubMed Central journal article supplement (PMC3490613)
Supplement: supp_pp.112.203083_203083HunterS_Fig1ABA.pdf [file supp_pp.112.203083_203083HunterS_Fig1ABA.pdf]

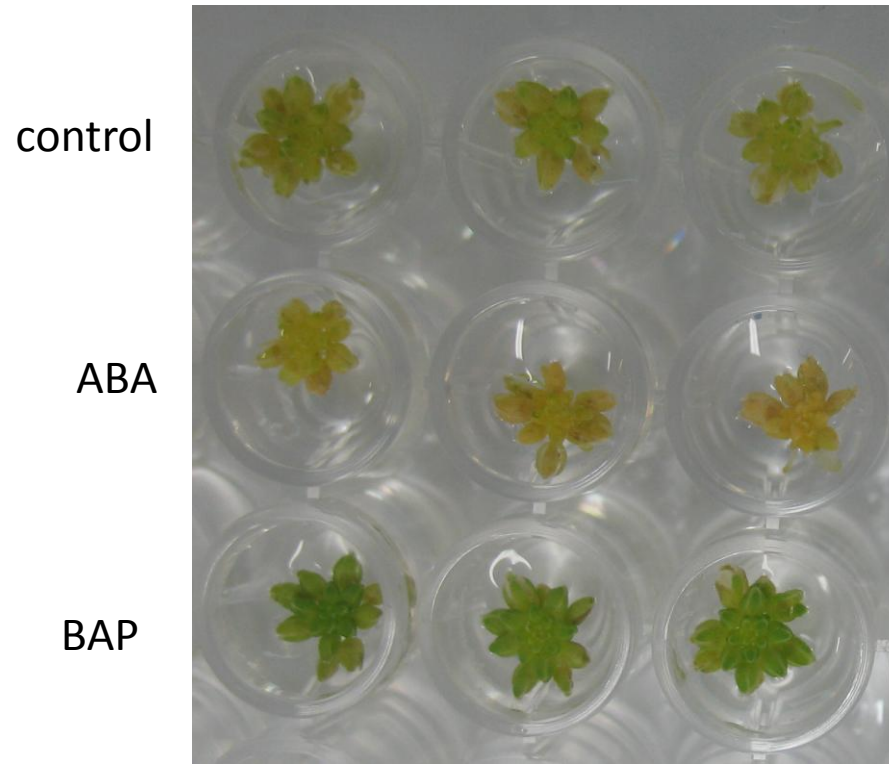

**Supplemental Figure 1.** Inflorescence de-greening is altered by treatment with hormones. *Ler-0* inflorescences were treated with 100  $\mu$ M ABA or 100  $\mu$ M BAP and held in the dark for 4 days.
