# Supplementary material
Source: PubMed Central journal article supplement (PMC3490613)
Supplement: supp_pp.112.203083_203083HunterS_Fig2Brez.pdf [file supp_pp.112.203083_203083HunterS_Fig2Brez.pdf]

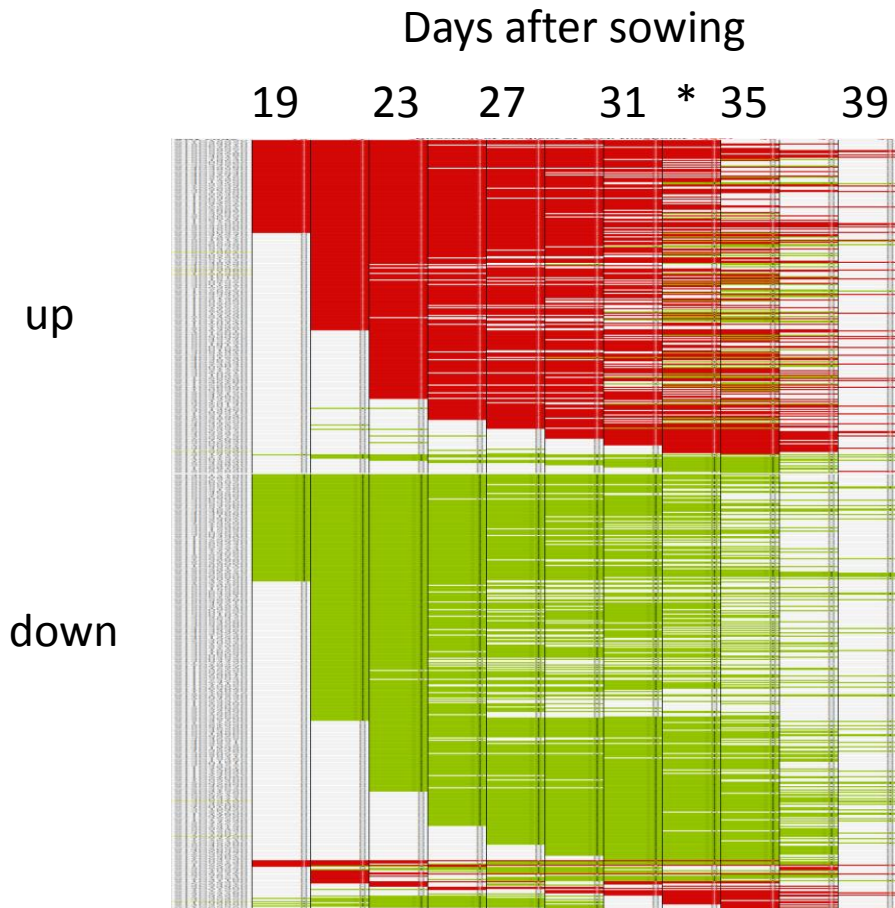

**Supplemental Figure 2.** Majority of genes in up- and down-regulated inflorescence gene sets are correspondingly up- and down-regulated in naturally aging leaves well before chlorophyll loss occurs. The expression of the 553 up- and 741-down regulated gene sets was analysed using the leaf-aging-related metadata of Breeze et al. (2011). Data for 301/553 and 394/741 genes was able to be extracted for the up- and down-regulated gene sets respectively. \* indicates when chlorophyll loss had significantly declined in the developmentally aging leaves. Colors indicate gene expression gradient changes, red/green means transcript abundance was higher/lower respectively compared with preceding time point.
