# Supplementary material
Source: PubMed Central journal article supplement (PMC3490613)
Supplement: supp_pp.112.203083_203083HunterS_Fig3chl.pdf [file supp_pp.112.203083_203083HunterS_Fig3chl.pdf]

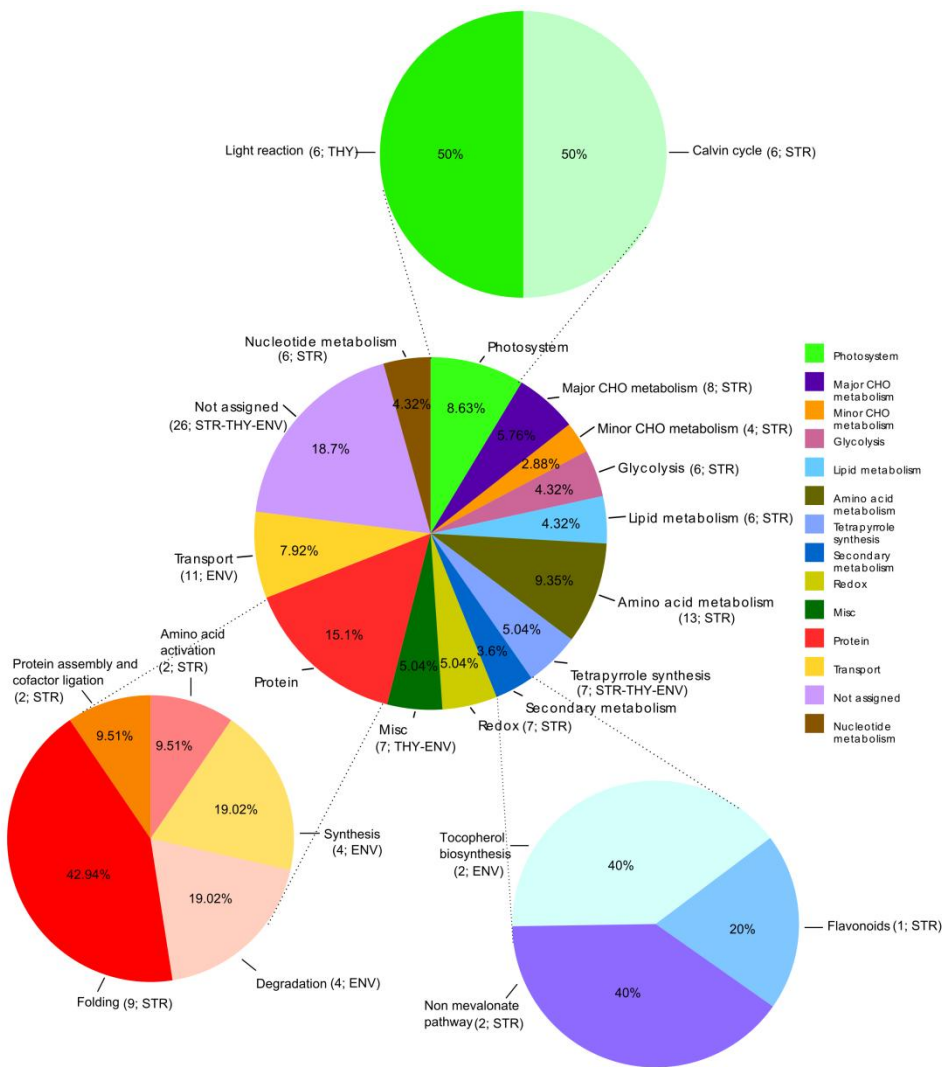

**Supplemental Figure 3.** Genes associated with chloroplast function are significantly down-regulated in the inflorescences by 24 h. The list of 248 genes identified in the term 'Chloroplast' by DAVID analysis (Supplemental Table S12) were processed using the AT\_CHLORO database which stores information for proteins that have been identified in different sub-fractions obtained from *A. thaliana* chloroplast. In total 147 down-regulated genes were able to be assigned to particular chloroplast compartments and to their respective MAPMAN bin. The pie graph was created using MAPMAN bins with ID numbers > 3.
