# Supplementary material
Source: PubMed Central journal article supplement (PMC3490613)
Supplement: supp_pp.112.203083_203083HunterS_Fig4glucgrn.pdf [file supp_pp.112.203083_203083HunterS_Fig4glucgrn.pdf]

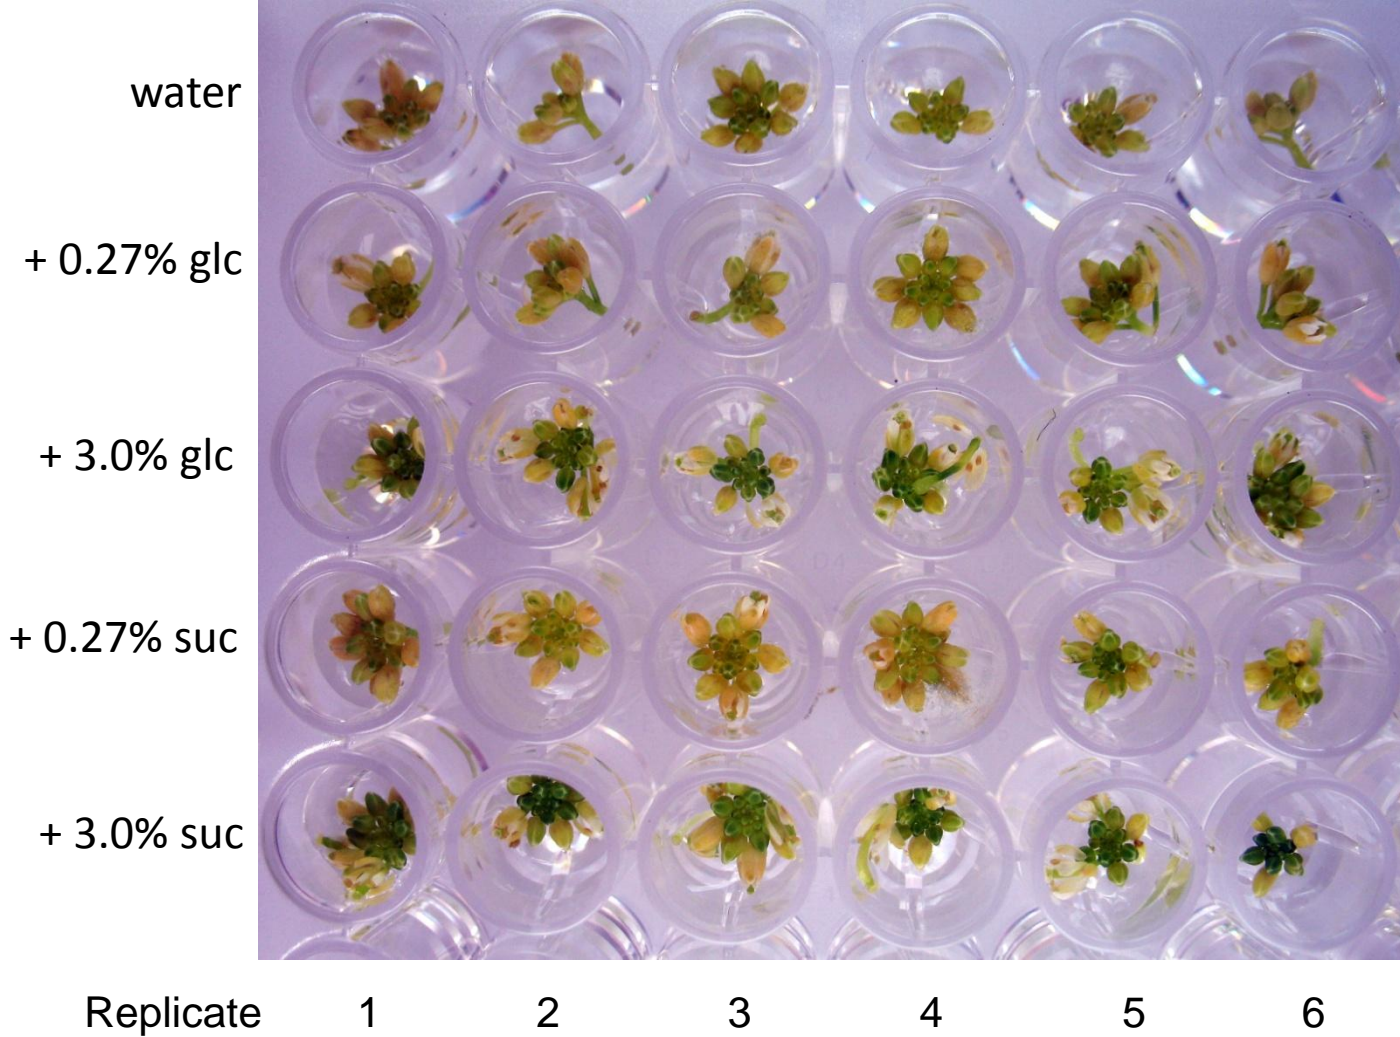

**Supplemental Figure 4.** Inflorescence de-greening is delayed by treatment with 3% glucose or sucrose. Plants grown under 16-h photoperiod at 21-22°C and inflorescences detached and held in the dark in water or water supplemented with 0.27% (15 mM) glucose, 3% glucose, 0.27% (7.9 mM) sucrose, 3% sucrose. Photo at D5
