# Supplementary material
Source: PubMed Central journal article supplement (PMC3490613)
Supplement: supp_pp.112.203083_203083HunterS_Fig5recov.pdf [file supp_pp.112.203083_203083HunterS_Fig5recov.pdf]

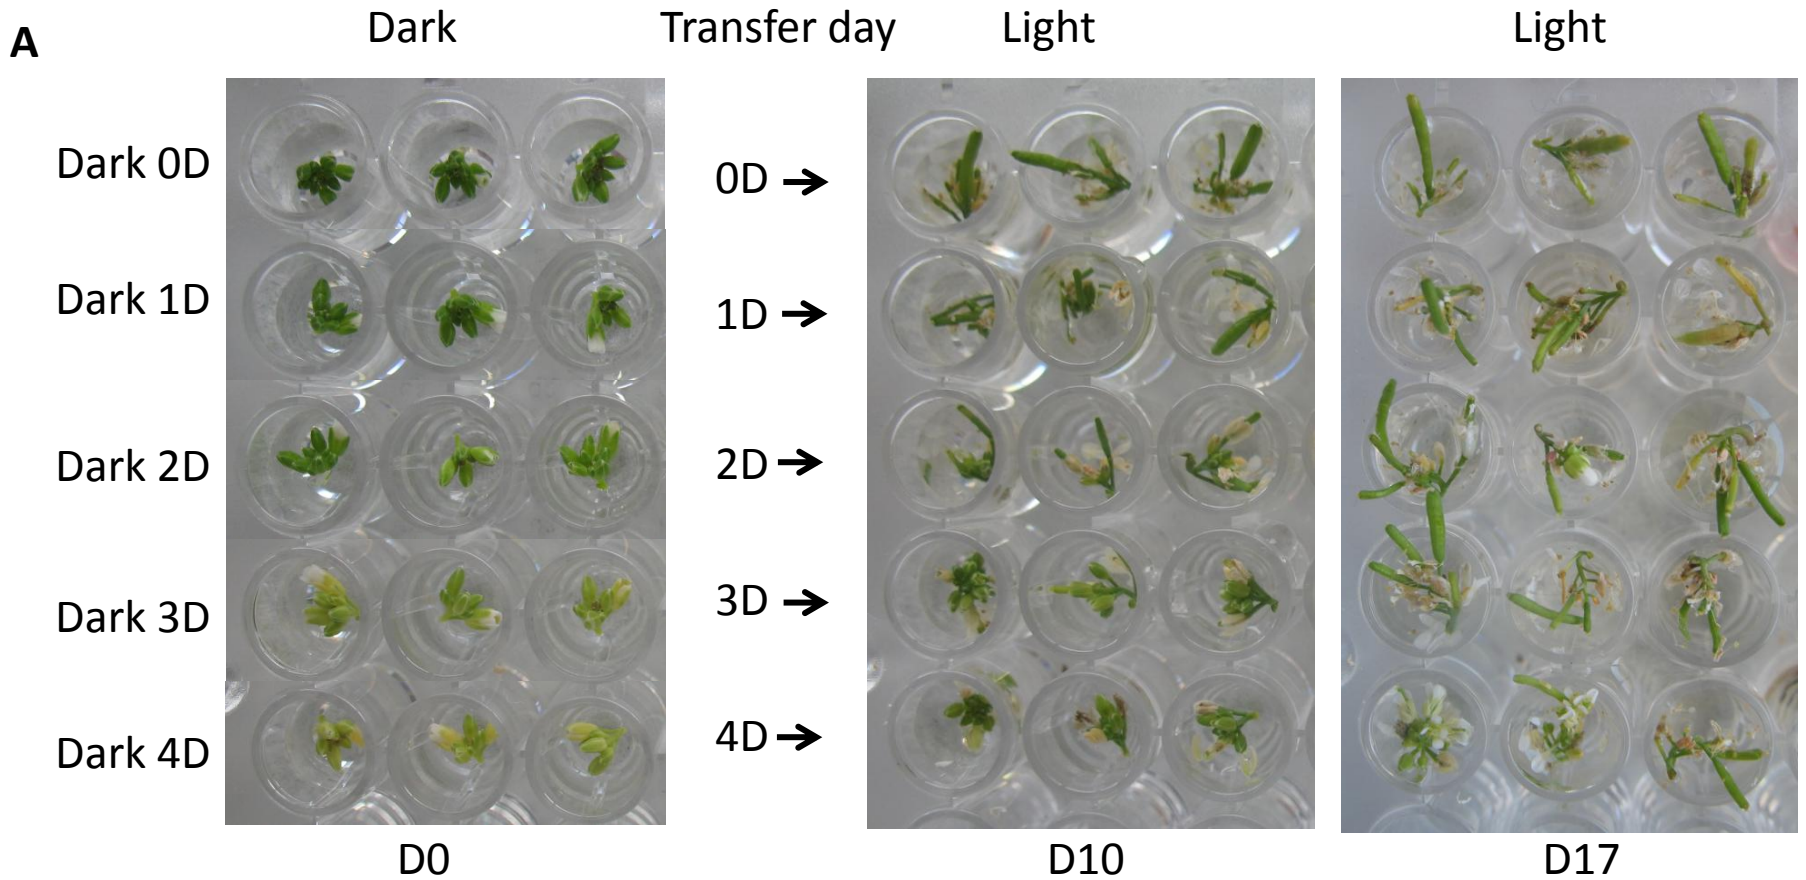

**Supplemental Figure 5.** Development is re-initiated when dark-held inflorescences are brought back out to light. A, On day 0, 1, 2, 3, and 4 triplicate inflorescences were removed from the dark and transferred to microtitre plates exposed to a 16-h photoperiod. Photos were then taken at D10 and D17.
