# Supplementary material
Source: PubMed Central journal article supplement (PMC3490613)
Supplement: supp_pp.112.203083_203083HunterS_Fig6ANAC.pdf [file supp_pp.112.203083_203083HunterS_Fig6ANAC.pdf]

Replicate

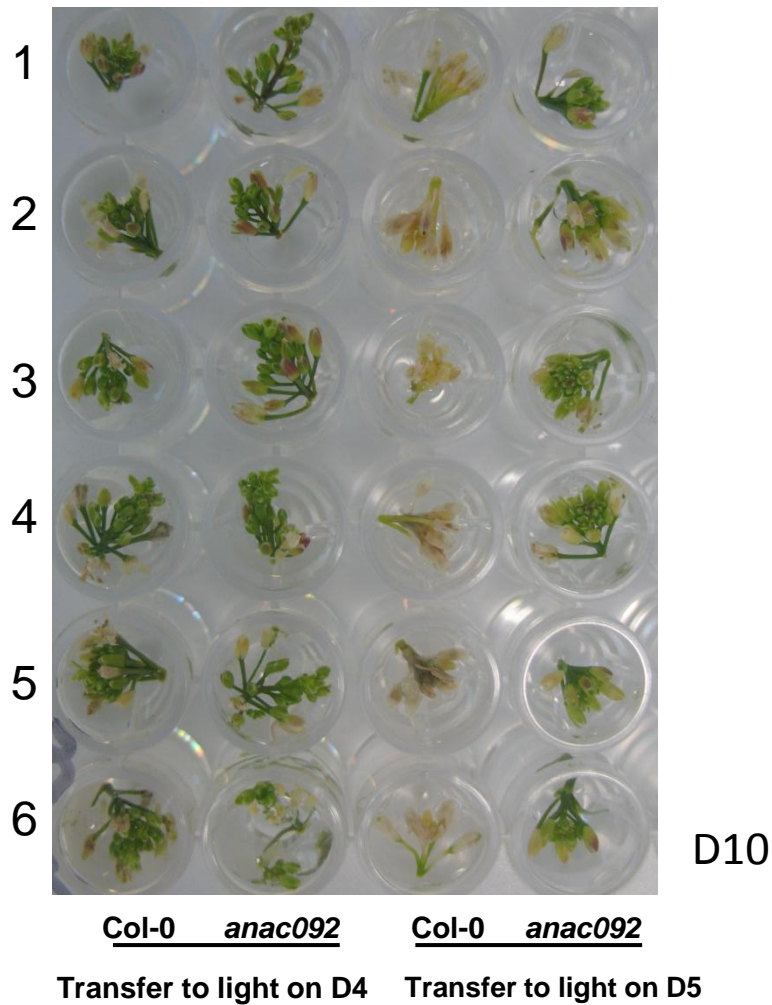

**Supplemental Figure 6.** ANAC092 activity limits ability of detached inflorescences to cope with dark stress. Col-0 and *anac092* inflorescences were held in dark for 4 or 5 days and transferred to continuous light. Photo taken at D10.
