# Supplementary material
Source: PubMed Central journal article supplement (PMC3490613)
Supplement: supp_pp.112.203083_203083HunterS_Fig7PIF.pdf [file supp_pp.112.203083_203083HunterS_Fig7PIF.pdf]

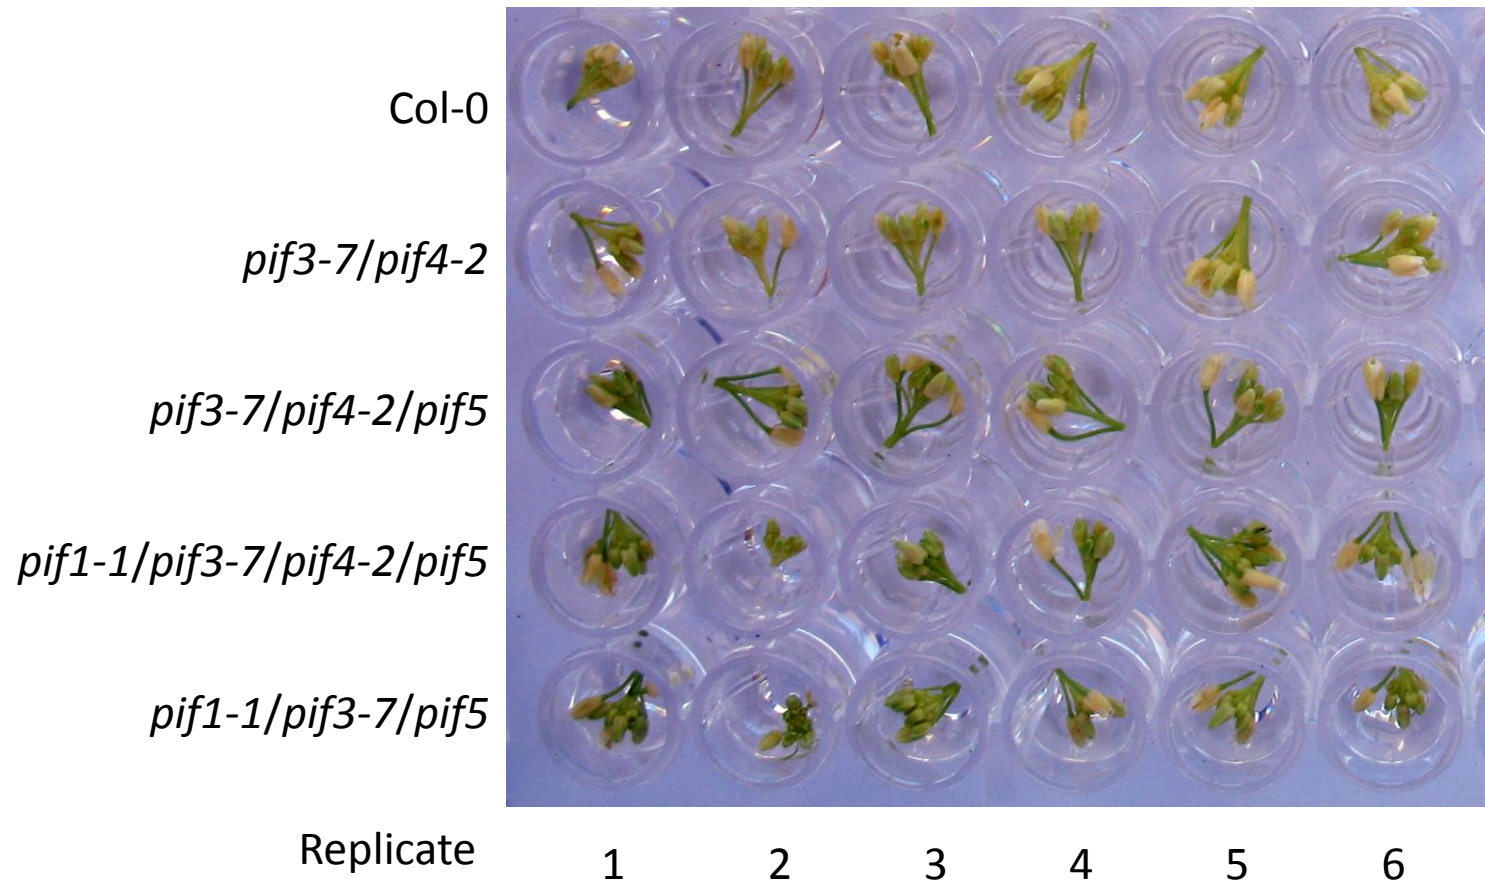

**Supplemental Figure 7.** Knockout of PIF transcription factors delays de-greening of detached dark-held inflorescences. Photo taken at D4 of dark incubation.
